# Supplementary material for: Effects of simulated augmented reality cueing in a virtual navigation task
Source: Frontiers journal article supplement (doi:10.3389/frvir.2022.971310), 2022-09-29
Supplement: Data_Sheet_1.PDF [file Data_Sheet_1.PDF]

The following Unity Assets were used to create the cities:

2016. *Playground*. Gest.

2021. *Ambulance with Interior*. Lowpoly\_Master.

2017. *Bus Stop Modern*. Lowpoly\_Master.

2020. *CScape City System*. OliVR.

2020. *Park Photo Scanned Assets*. NatureManufacture.

2018. *City Pack - Trash 110+*. Pedro H Crispim.

2019. *51 Road Props*. Pro 3D models.

2018. *Low-poly cars pack (3 cars)*. Pro 3D models.

2018. *Low-poly Helicopter (police and ambulance)*. Pro 3D models.

2018. *Low-poly School Bus*. Pro 3D models.

2021. *Gazebo*. Rescue3D Game Assets.

2019. *Streets & Traffic Signs*. ribrado.
